# Supplementary material for: The Involvement of Macrophage Colony Stimulating Factor on Protein Hydrolysate Injection Mediated Hematopoietic Function Improvement
Source: MDPI journal article supplement (doi:10.3390/cells10102776), 2021-10-16
Supplement: s1 [file s1]

Article

# The Involvement of Macrophage Colony Stimulating Factor on Protein Hydrolysate Injection Mediated Hematopoietic Function Improvement

Shimiao Wang <sup>1,2,†</sup>, Yuchong Zhang <sup>2,†</sup>, Weiqi Meng <sup>1</sup>, Yihao Dong <sup>2</sup>, Sujie Zhang <sup>2</sup>, Lesheng Teng <sup>1</sup>, Yang Liu <sup>2</sup>, Lanzhou Li <sup>1,2,\*</sup> and Di Wang <sup>1,2,\*</sup>

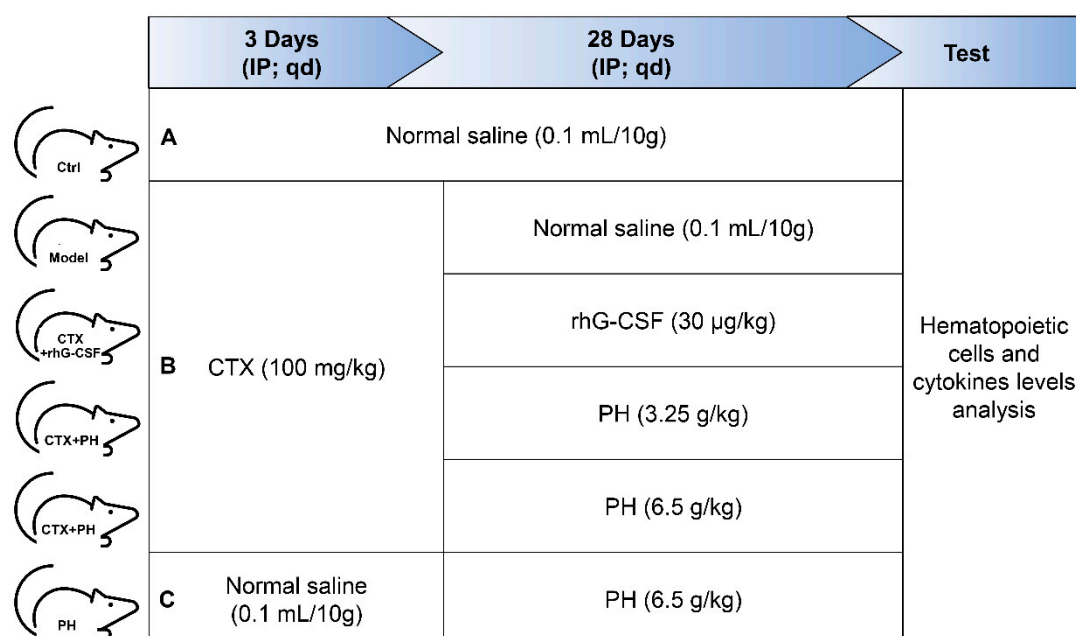

**Supplementary Figure S1** The animal experimental schemes flow charts. CTX, cyclophosphamide; Ctrl, control; Model, hematopoietic dysfunction model; NS, normal saline; rhG-CSF, recombinant human granulocyte colony-stimulating factor; PH, protein hydrolysate injection.

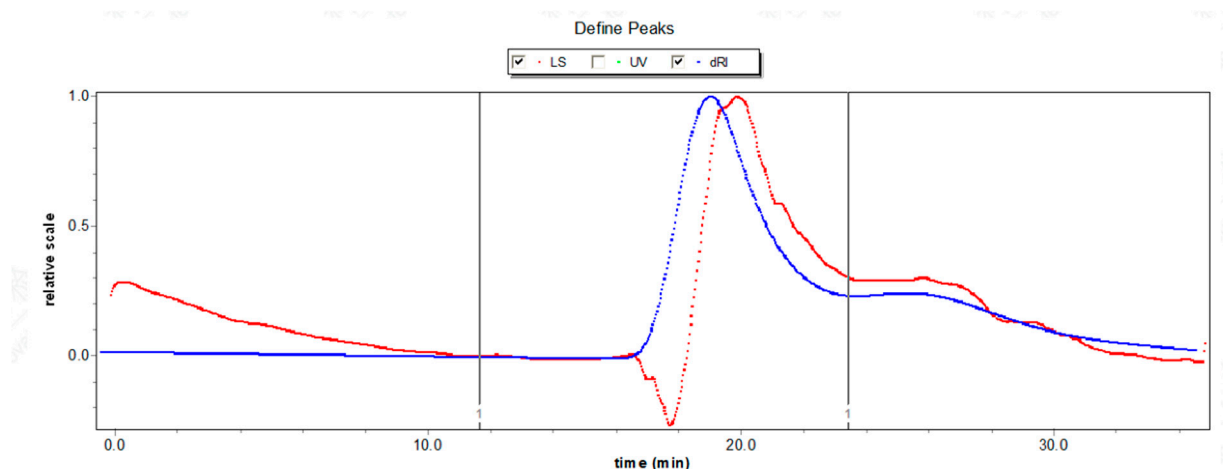

**Supplementary Figure S2** Define peaks of PH.

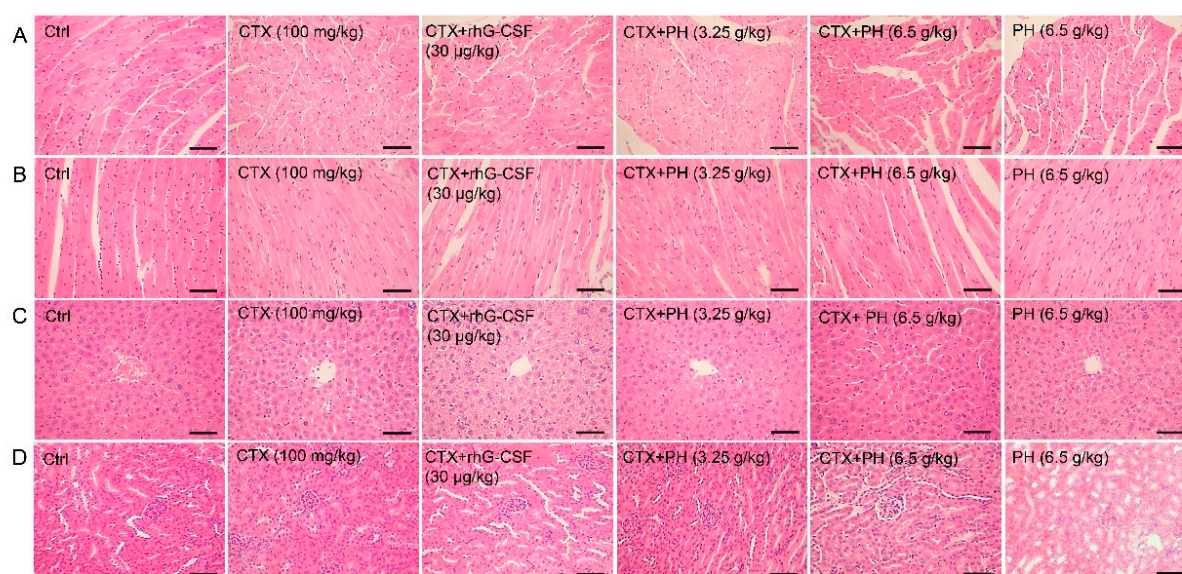

**Supplementary Figure S3** H&E staining was used to evaluate pathological alterations of (A) heart (cross section), (B) heart (longitudinal section), (C) liver and (D) kidney under a light-microscope digital camera (200 ×; scale bar, 100 μm) (n = 3 mice/group in triplicate). CTX, cyclophosphamide; Ctrl, control; Model, hematopoietic dysfunction model; rhG-CSF, recombinant human granulocyte colony-stimulating factor; PH, Protein hydrolysate injection.

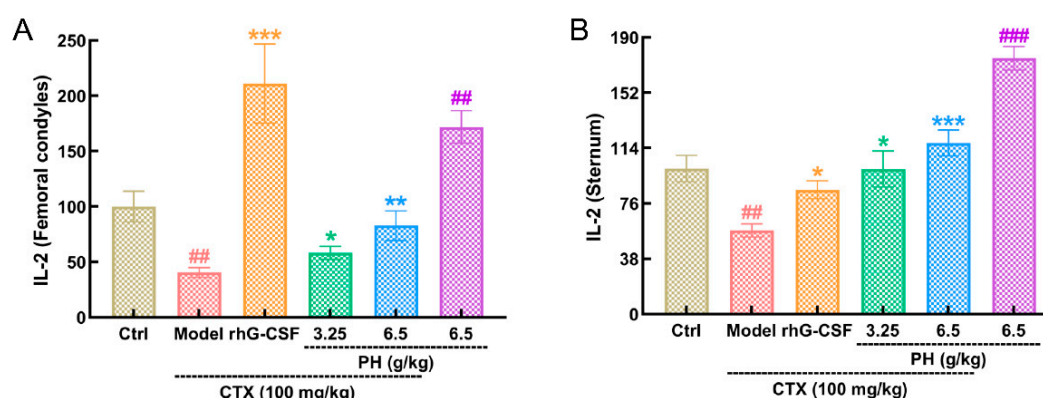

**Supplementary Figure S4** Quantitative graph of the expression of IL-2 in the femoral condyle and sternum of mice with hematopoietic dysfunction. Histopathological observations of sternum and femoral condyles of mice with hematopoietic dysfunction. PH enhanced the expression levels of IL-2 in (A) femoral condyle and (B) sternum detected by immunohistochemical staining. Data are showed as the mean ± SD (n = 3 mice/group in triplicate) and determined via a one-way ANOVA test followed by a Tukey's post hoc test comparison. ##*p* < 0.01 and ###*p* < 0.001 vs. control group, \**p* < 0.05, \*\**p* < 0.01 and \*\*\**p* < 0.001 vs. model group. CTX, cyclophosphamide; Ctrl, control; Model, hematopoietic dysfunction model; rhG-CSF, recombinant human granulocyte colony-stimulating factor; PH, Protein hydrolysate injection; IL-2, interleukin 2.

**Supplementary Table 1** The effects of PH and rhG-CSF on body weight and organ indexes of CTX induced hematopoietic dysfunction mice.

Data are showed as the means  $\pm$  S.D. (n=15 mice/group). CTX, cyclophosphamide; Ctrl, control; Model, hematopoietic dysfunction model; rhG-CSF, recombinant human granulocyte colony-stimulating factor; PH, Protein hydrolysate injection.  $^{*}p < 0.01$  and  $^{***}p < 0.001$  vs. Ctrl group,  $^{*}p < 0.05$ ,  $^{**}p < 0.01$  and  $^{***}p < 0.001$  vs. Model group. CTX,

|                 |                      | CTX (100 mg/kg) |                               |                              |                              |                               | PH<br>(6.5 g/kg) |
|-----------------|----------------------|-----------------|-------------------------------|------------------------------|------------------------------|-------------------------------|------------------|
|                 |                      | Ctrl            | Model                         | rhG-CSF<br>(30 $\mu$ g/kg)   | PH<br>(3.25 g/kg)            | PH<br>(6.5 g/kg)              |                  |
| Body weight (g) | 1 <sup>st</sup> day  | 22.9 $\pm$ 2.1  | 23.5 $\pm$ 2.1                | 23.5 $\pm$ 1.0               | 23.5 $\pm$ 1.4               | 23.7 $\pm$ 0.9                | 23.3 $\pm$ 0.9   |
|                 | 4 <sup>th</sup> day  | 24.3 $\pm$ 2.4  | 22.2 $\pm$ 1.5 <sup>##</sup>  | 23 $\pm$ 1.3                 | 22.3 $\pm$ 1.4               | 22.5 $\pm$ 1.1                | 24.6 $\pm$ 0.9   |
|                 | 11 <sup>th</sup> day | 25.7 $\pm$ 1.7  | 22.7 $\pm$ 1.6 <sup>###</sup> | 21.5 $\pm$ 2.0               | 23.3 $\pm$ 1.6               | 23.4 $\pm$ 1.2                | 26.2 $\pm$ 1.0   |
|                 | 18 <sup>th</sup> day | 26.0 $\pm$ 2.3  | 23.4 $\pm$ 1.6 <sup>##</sup>  | 24.5 $\pm$ 1.0               | 24.4 $\pm$ 1.4               | 24.5 $\pm$ 1.2                | 27.4 $\pm$ 1.0   |
|                 | 25 <sup>th</sup> day | 26.8 $\pm$ 2.7  | 21.6 $\pm$ 1.7 <sup>###</sup> | 23.7 $\pm$ 1.4 <sup>**</sup> | 22.7 $\pm$ 1.3               | 23.3 $\pm$ 1.6 <sup>*</sup>   | 27.9 $\pm$ 1.2   |
|                 | 32 <sup>nd</sup> day | 27.4 $\pm$ 1.9  | 20.7 $\pm$ 2.7 <sup>###</sup> | 23.1 $\pm$ 1.4 <sup>**</sup> | 23.6 $\pm$ 1.5 <sup>**</sup> | 23.0 $\pm$ 1.4 <sup>**</sup>  | 28.5 $\pm$ 1.4   |
| Organ index (%) | Liver index          | 48.9 $\pm$ 3.2  | 49.7 $\pm$ 3.0                | 52.0 $\pm$ 3.5               | 51.7 $\pm$ 2.9               | 51.9 $\pm$ 3.9                | 48.6 $\pm$ 3.8   |
|                 | Kidney index         | 14.5 $\pm$ 0.9  | 13.6 $\pm$ 1.2                | 13.5 $\pm$ 0.7               | 12.0 $\pm$ 1.6               | 13.9 $\pm$ 1.6                | 14.0 $\pm$ 0.8   |
|                 | Spleen index         | 3.5 $\pm$ 0.4   | 13.4 $\pm$ 0.8 <sup>###</sup> | 12.2 $\pm$ 1.2               | 9.8 $\pm$ 1.5 <sup>***</sup> | 10.1 $\pm$ 1.0 <sup>***</sup> | 3.3 $\pm$ 0.2    |
|                 | Thymus index         | 1.6 $\pm$ 0.2   | 0.5 $\pm$ 0.3 <sup>###</sup>  | 1.0 $\pm$ 0.5 <sup>**</sup>  | 0.8 $\pm$ 0.4 <sup>*</sup>   | 0.6 $\pm$ 0.3                 | 1.4 $\pm$ 0.2    |

cyclophosphamide; Ctrl, control; Model, hematopoietic dysfunction model; rhG-CSF, recombinant human granulocyte colony-stimulating factor; PH, Protein hydrolysate injection.
